# Supplementary material for: Endoscopic Delivery of Polymers Reduces Delayed Bleeding after Gastric Endoscopic Submucosal Dissection: A Systematic Review and Meta-Analysis
Source: MDPI journal article supplement (doi:10.3390/polym14122387), 2022-06-13
Supplement: s1 [file s1]

**Supplementary Table S1.1 Quality of cohort and single-arm studies**

| Article<br>(Author,<br>year) | Selection                                |                                    |                           |                                                                          | Comparability | Outcome               |                     |                       | Total<br>score |
|------------------------------|------------------------------------------|------------------------------------|---------------------------|--------------------------------------------------------------------------|---------------|-----------------------|---------------------|-----------------------|----------------|
|                              | Representativeness of the exposed cohort | Selection of the nonexposed cohort | Ascertainment of exposure | Demonstration that outcome of interest was not present at start of study |               | Assessment of outcome | Length of follow-up | Adequacy of follow-up |                |
| Akimoto, 2022                | 1                                        | 0                                  | 1                         | 1                                                                        | 0             | 1                     | 1                   | 1                     | 6              |
| Choi, 2008                   | 1                                        | 1                                  | 1                         | 1                                                                        | 2             | 1                     | 0                   | 1                     | 8              |
| Ego, 2020                    | 1                                        | 1                                  | 1                         | 1                                                                        | 2             | 1                     | 1                   | 1                     | 9              |
| Fukuda, 2016                 | 1                                        | 1                                  | 1                         | 1                                                                        | 2             | 1                     | 1                   | 1                     | 9              |
| Goto, 2020                   | 1                                        | 0                                  | 1                         | 1                                                                        | 0             | 1                     | 0                   | 1                     | 5              |
| Hahn, 2017                   | 1                                        | 0                                  | 1                         | 1                                                                        | 0             | 1                     | 1                   | 1                     | 6              |
| Han, 2020                    | 1                                        | 0                                  | 1                         | 1                                                                        | 0             | 1                     | 1                   | 1                     | 6              |
| Kawata, 2018                 | 1                                        | 1                                  | 1                         | 1                                                                        | 2             | 1                     | 0                   | 1                     | 8              |
| Kikuchi, 2019                | 1                                        | 1                                  | 1                         | 1                                                                        | 2             | 1                     | 1                   | 1                     | 9              |
| Maekawa, 2015                | 1                                        | 0                                  | 1                         | 1                                                                        | 0             | 1                     | 1                   | 0                     | 5              |
| Nishiyama,                   | 1                                        | 0                                  | 1                         | 1                                                                        | 0             | 1                     | 0                   | 1                     | 5              |

|                   |   |   |   |   |   |   |   |   |   |
|-------------------|---|---|---|---|---|---|---|---|---|
| 2022              |   |   |   |   |   |   |   |   |   |
| Sabramaniam, 2019 | 1 | 0 | 1 | 1 | 0 | 1 | 1 | 1 | 6 |
| Shiotsuki, 2021   | 1 | 1 | 1 | 1 | 2 | 1 | 1 | 1 | 9 |
| Tan, 2016         | 1 | 1 | 1 | 1 | 2 | 1 | 1 | 1 | 9 |
| Uraoka, 2016      | 1 | 0 | 1 | 1 | 0 | 1 | 1 | 1 | 6 |
| Wang, 2020        | 1 | 1 | 1 | 1 | 2 | 1 | 1 | 1 | 9 |
| Yoshida, 2021     | 1 | 0 | 1 | 1 | 0 | 1 | 1 | 0 | 5 |
| Yu, 2022          | 1 | 1 | 1 | 1 | 2 | 1 | 0 | 0 | 7 |

**Supplementary Table S1.2 Quality of non-randomized controlled studies**

|             | <b>Bias due to confounding</b> | <b>Bias in selection of participants into the study</b> | <b>Bias in classification of interventions</b> | <b>Bias due to deviations from intended intervention</b> | <b>Bias due to missing data</b> | <b>Bias in measurement of outcomes</b> | <b>Bias in selection of the reported result</b> | <b>Overall bias</b> |
|-------------|--------------------------------|---------------------------------------------------------|------------------------------------------------|----------------------------------------------------------|---------------------------------|----------------------------------------|-------------------------------------------------|---------------------|
| Tsuji, 2015 | Moderate risk                  | low risk                                                | low risk                                       | low risk                                                 | low risk                        | low risk                               | low risk                                        | Moderate risk       |

**Supplementary Table 1.3 Quality of randomized controlled studies**

| <b>Random sequence</b> | <b>Allocation concealment</b> | <b>Blinding of participants and</b> | <b>Blinding of outcome</b> | <b>Incomplete outcome data</b> | <b>Selective reporting</b> | <b>Other bias</b> |
|------------------------|-------------------------------|-------------------------------------|----------------------------|--------------------------------|----------------------------|-------------------|
|------------------------|-------------------------------|-------------------------------------|----------------------------|--------------------------------|----------------------------|-------------------|

|                  | <b>generation<br/>(selection bias)</b> | <b>(selection bias)</b> | <b>personnel<br/>(performance bias)</b> | <b>assessment<br/>(detection bias)</b> | <b>(attrition bias)</b> | <b>(reporting<br/>bias)</b> |             |
|------------------|----------------------------------------|-------------------------|-----------------------------------------|----------------------------------------|-------------------------|-----------------------------|-------------|
| Hwang,<br>2018   | low risk                               | unclear risk            | high risk                               | high risk                              | low risk                | low risk                    | low<br>risk |
| Jung,<br>2021    | low risk                               | low risk                | high risk                               | high risk                              | low risk                | low risk                    | low<br>risk |
| Kataoka,<br>2019 | unclear risk                           | unclear risk            | high risk                               | high risk                              | low risk                | low risk                    | low<br>risk |
| Lee,<br>2011     | unclear risk                           | unclear risk            | high risk                               | high risk                              | low risk                | low risk                    | low<br>risk |
| Mori,<br>2018    | unclear risk                           | low risk                | high risk                               | high risk                              | low risk                | low risk                    | low<br>risk |
| Zhang,<br>2013   | unclear risk                           | unclear risk            | high risk                               | high risk                              | low risk                | low risk                    | low<br>risk |

**Supplementary Table S1.4 Quality of case series**

|                  | <b>Selection</b>   | <b>Ascertainment</b> |         |                                    | <b>Causality</b>                    |                             | <b>Reporting</b>       |   |
|------------------|--------------------|----------------------|---------|------------------------------------|-------------------------------------|-----------------------------|------------------------|---|
|                  | Representativeness | exposure             | outcome | Ruled out<br>alternative<br>causes | Challenge/rechallenge<br>phenomenon | Dose-<br>response<br>effect | Length of<br>follow-up |   |
| Abiko,<br>2021   | 1                  | 1                    | 1       | 0                                  | -                                   | -                           | 0                      | 1 |
| Haddara,<br>2016 | 1                  | 1                    | 1       | 0                                  | -                                   | -                           | 1                      | 1 |
| Goto, 2017       | 1                  | 1                    | 1       | 0                                  | -                                   | -                           | 1                      | 1 |
| Kantsevov,       | 1                  | 1                    | 1       | 0                                  | -                                   | -                           | 1                      | 1 |

|            |   |   |   |   |   |   |   |   |
|------------|---|---|---|---|---|---|---|---|
| 2014       |   |   |   |   |   |   |   |   |
| Kobayashi, | 1 | 1 | 1 | 0 | - | - | 0 | 1 |
| 2021       |   |   |   |   |   |   |   |   |
| Pioche,    | 1 | 1 | 1 | 0 | - | - | 1 | 1 |
| 2016       |   |   |   |   |   |   |   |   |
