# Supplementary material for: Endoscopic Delivery of Polymers Reduces Delayed Bleeding after Gastric Endoscopic Submucosal Dissection: A Systematic Review and Meta-Analysis
Source: MDPI journal article supplement (doi:10.3390/polym14122387), 2022-06-13
Supplement: s1 [file s1]

**Supplementary Table S2.** League table describing efficacy of all endoscopic approaches for prevention of delayed bleeding after gastric ESD according to network meta-analysis

| In patients overall   |                     |                     |                  |
|-----------------------|---------------------|---------------------|------------------|
| Control               |                     |                     |                  |
| 0.54 (-0.40, 1.56)    | Endoscopic closure  |                     |                  |
| 0.97 (0.13, 1.91)     | 0.42 (-0.88, 1.75)  | Tissue shielding    |                  |
| 1.07 (0.28, 2.07)     | 0.52 (-0.73, 1.92)  | 0.10 (-1.11, 1.42)  | Hemostatic spray |
| In high-risk patients |                     |                     |                  |
| Control               |                     |                     |                  |
| 0.41 (-0.49, 1.56)    | Endoscopic closure  |                     |                  |
| 1.15 (0.27, 2.13)     | 0.72 (-0.70, 2.05)  | Tissue shielding    |                  |
| 0.36 (-0.95, 1.71)    | -0.07 (-1.81, 1.54) | -0.79 (-2.43, 0.82) | Hemostatic spray |
| In low-risk patients  |                     |                     |                  |
| Control               |                     |                     |                  |
| 0.23 (-4.02, 3.75)    | Endoscopic closure  |                     |                  |
| 0.33 (-4.21, 4.89)    | 0.11 (-5.50, 6.44)  | Tissue shielding    |                  |
| 2.25 (0.13, 5.18)     | 2.06 (-1.92, 7.45)  | 1.89 (-2.83, 7.49)  | Hemostatic spray |
